# Supplementary material
Source: PubMed Central journal article supplement (PMC4754110)

**A. LGr3 (IDH mutant) GO enrichments (GBM vs LGG)**

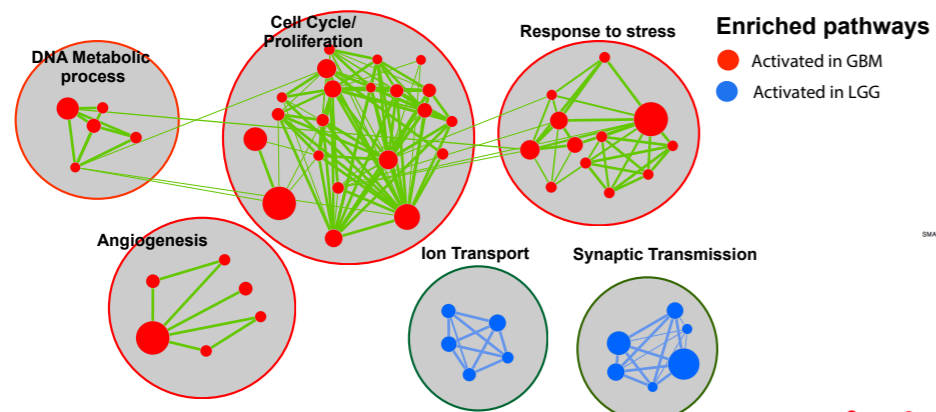

**C. LGr3 (IDH mutant) PARADIGM results (GBM vs LGG)**

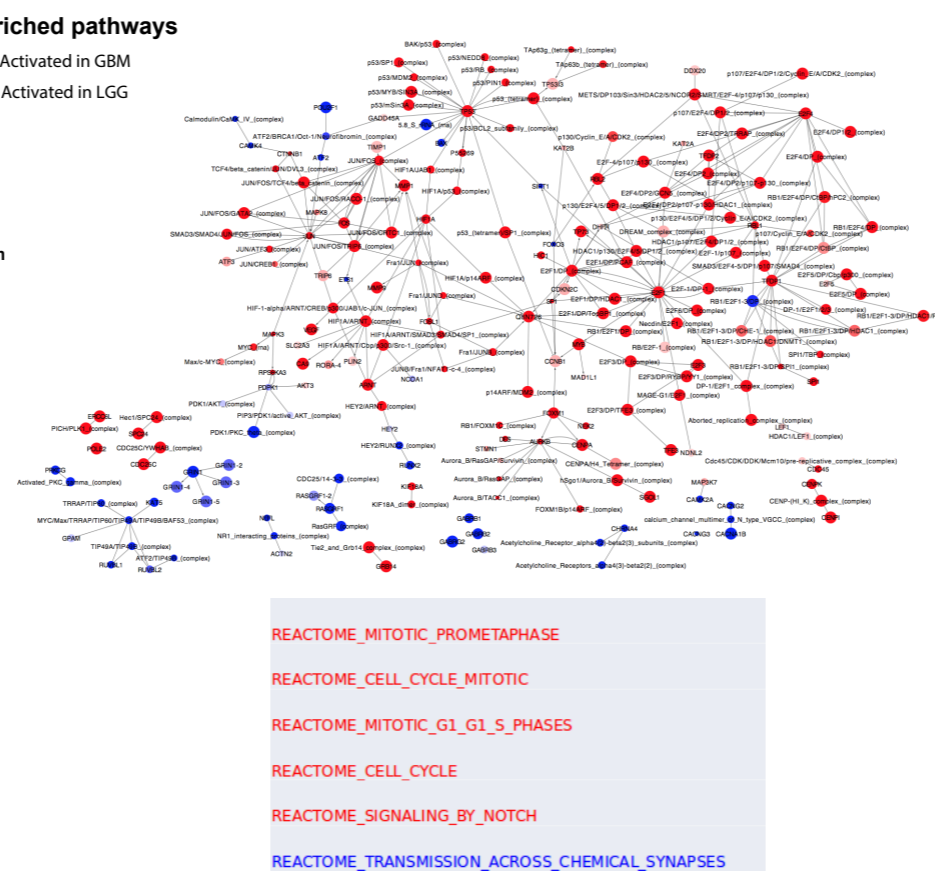

**D. LGr4 (IDH wildtype) PARADIGM results (GBM vs LGG)**

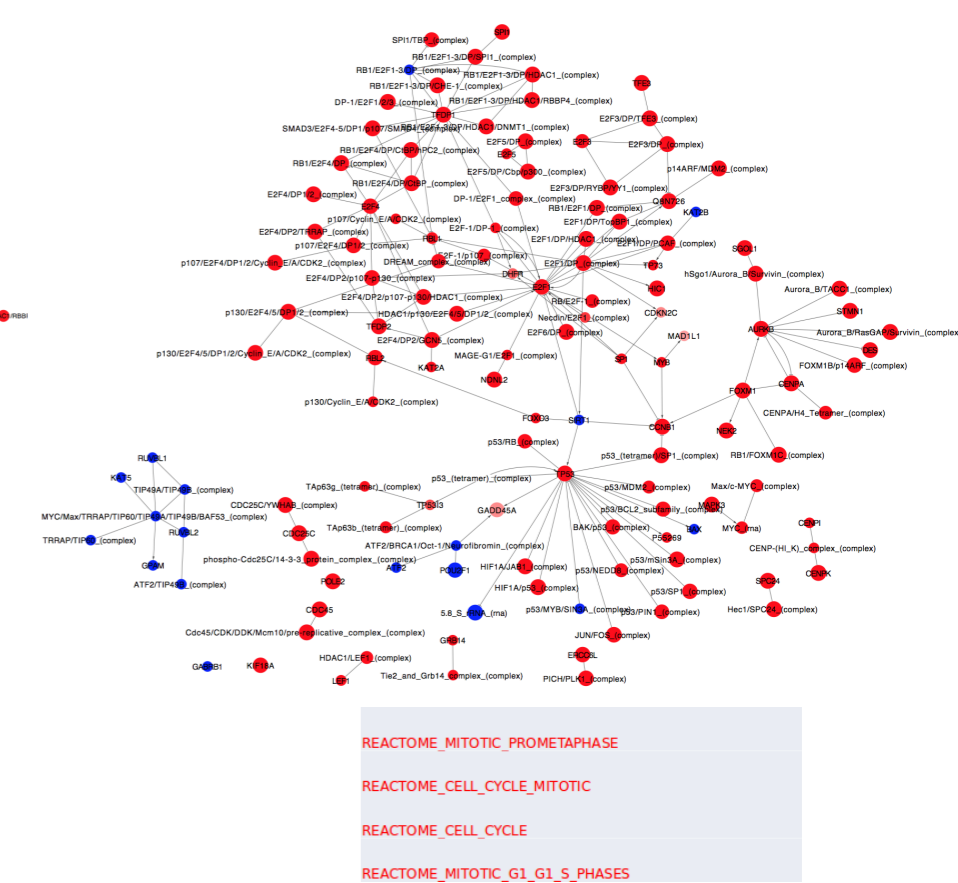

**B. LGr4 (IDH wildtype) GO enrichments (GBM vs LGG)**

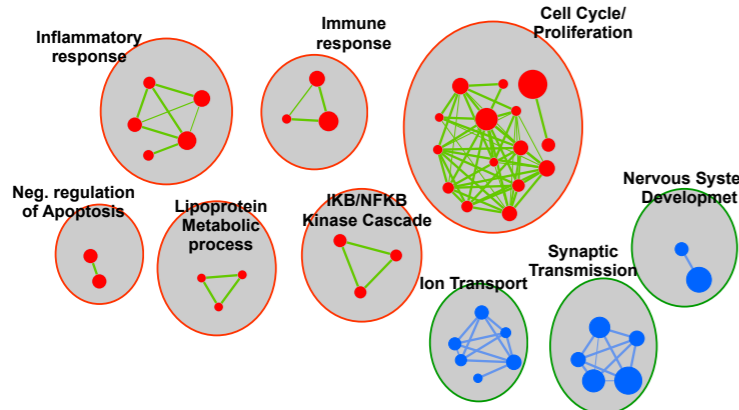

**E. The process for extracting significantly active pathway from the glioma data**

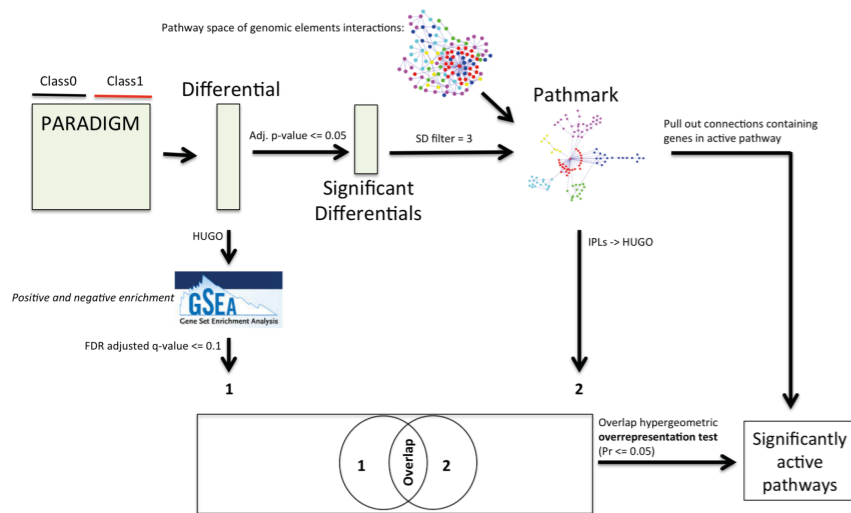

**F. EstimateScore by Tumor type (IDH-wildtype)**

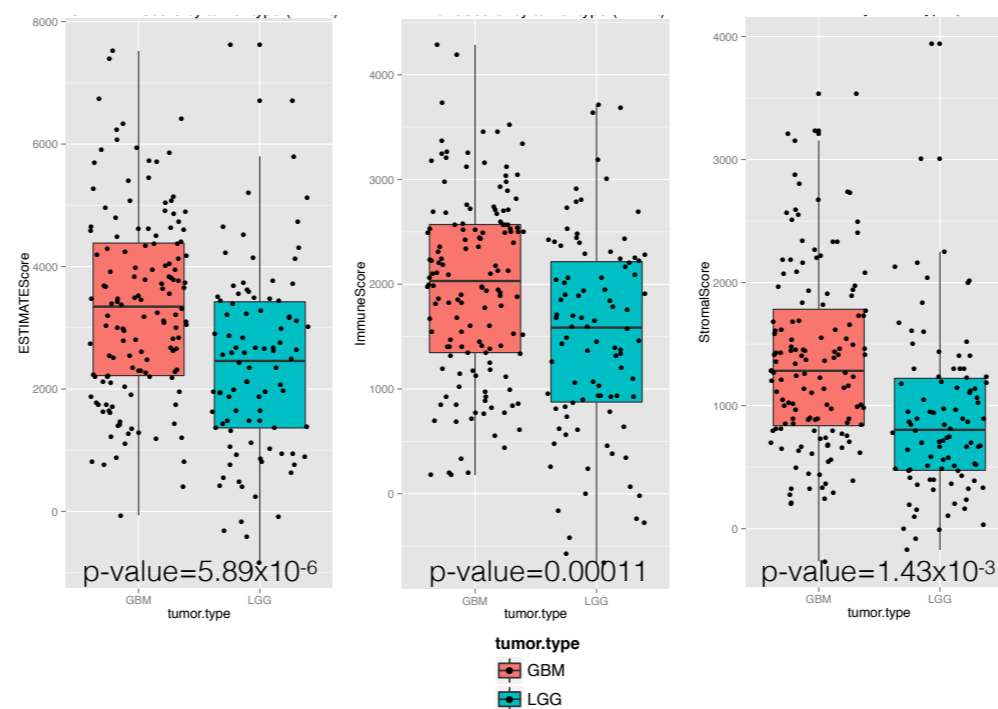

Supplement: NIHMS746836-supplement-2.pdf [file NIHMS746836-supplement-2.pdf]
