# Supplementary material
Source: PubMed Central journal article supplement (PMC4754110)

**A**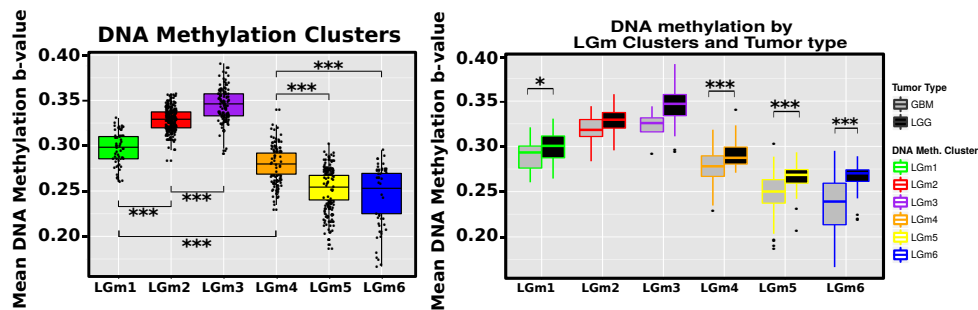**B**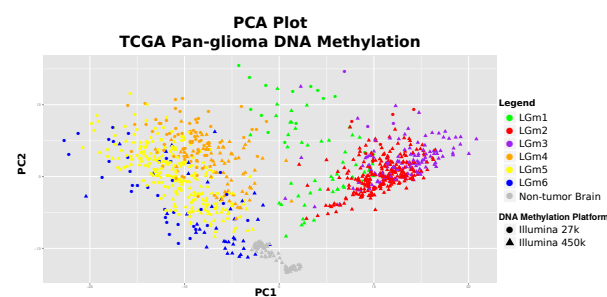**C**

**TCGA Pan-glioma mRNA merging analysis**

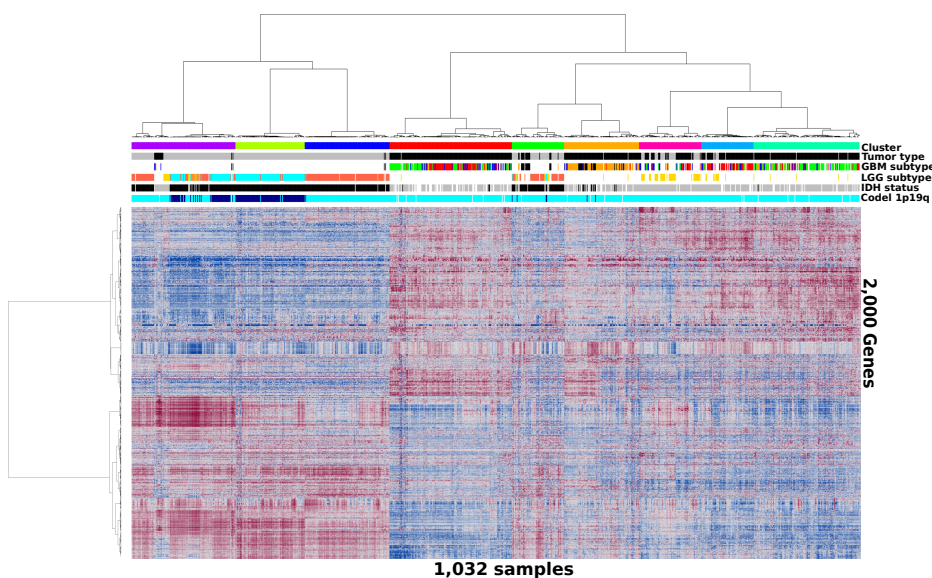**D**

**TCGA Pan-glioma fCV signature clustering**

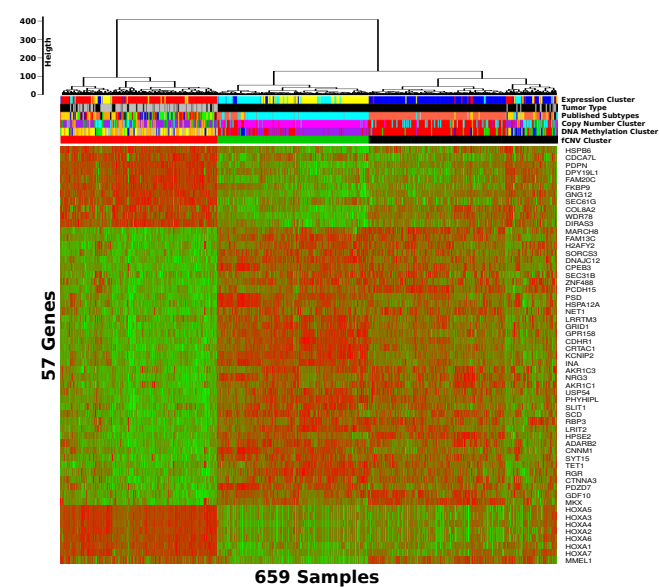**E**

**TCGA Pan-glioma RPPA analysis**

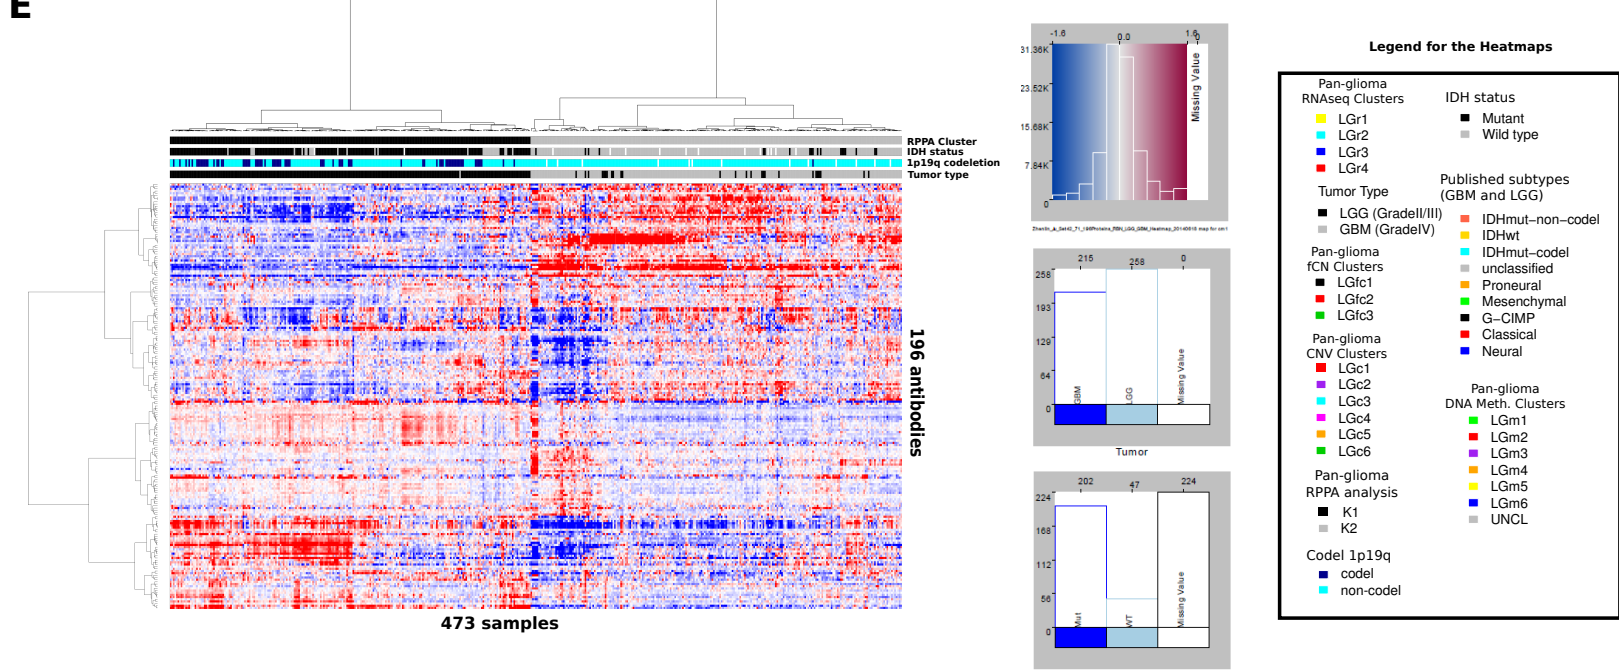

Supplement: NIHMS746836-supplement-3.pdf [file NIHMS746836-supplement-3.pdf]
