# Supplementary material
Source: PubMed Central journal article supplement (PMC4754110)

**A****TCGA Set**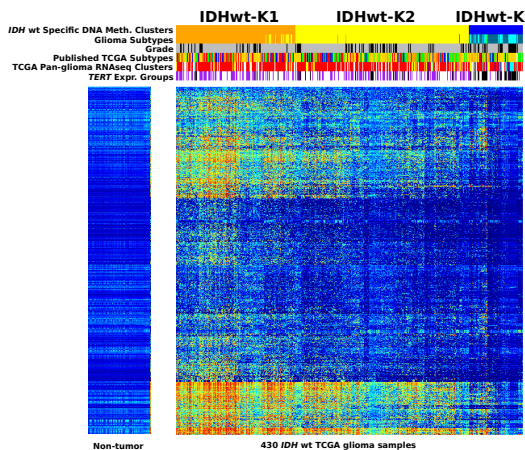**B****Validation Set**  
Sturm et al. (n=114), Lambert et al. (n=61)  
Turcan et al. (n=32), Mur et al. (n=14)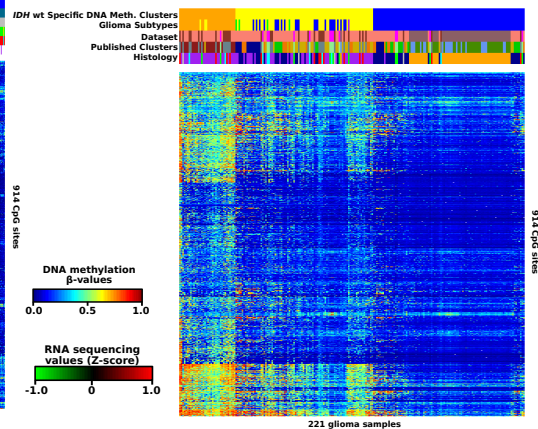**C****TCGA Set**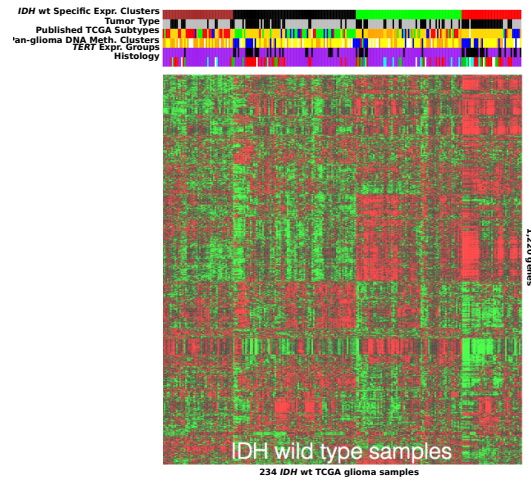**Legend**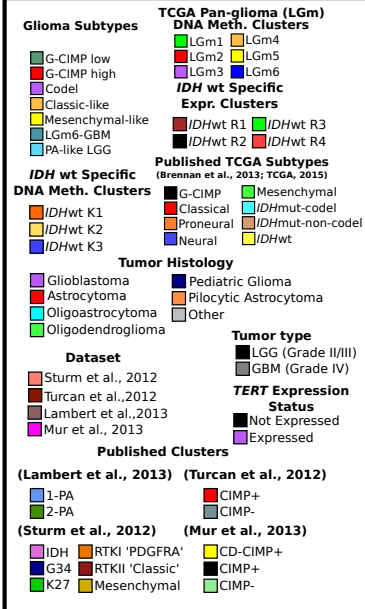**D****Glioma IDH wt Subtypes by Estimate Stromal Score**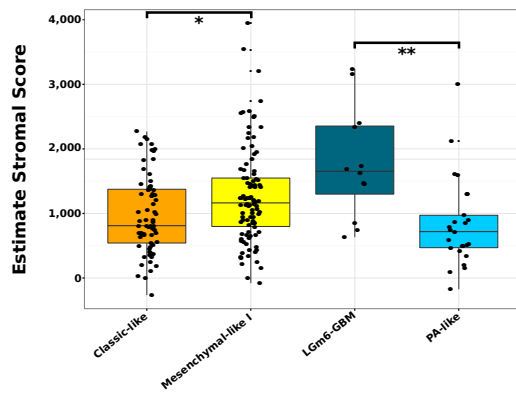**E**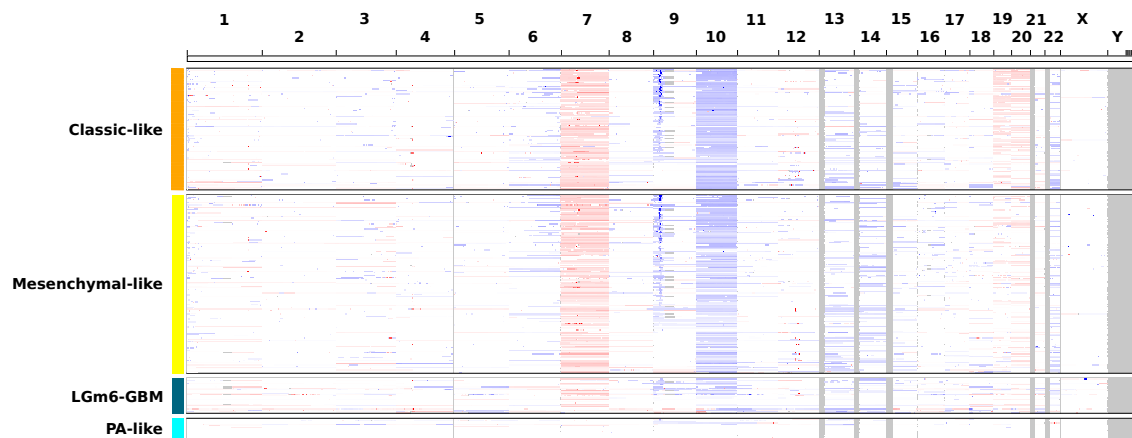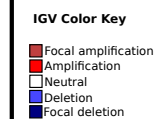

Supplement: NIHMS746836-supplement-5.pdf [file NIHMS746836-supplement-5.pdf]
