# Supplementary material
Source: PubMed Central journal article supplement (PMC4754110)

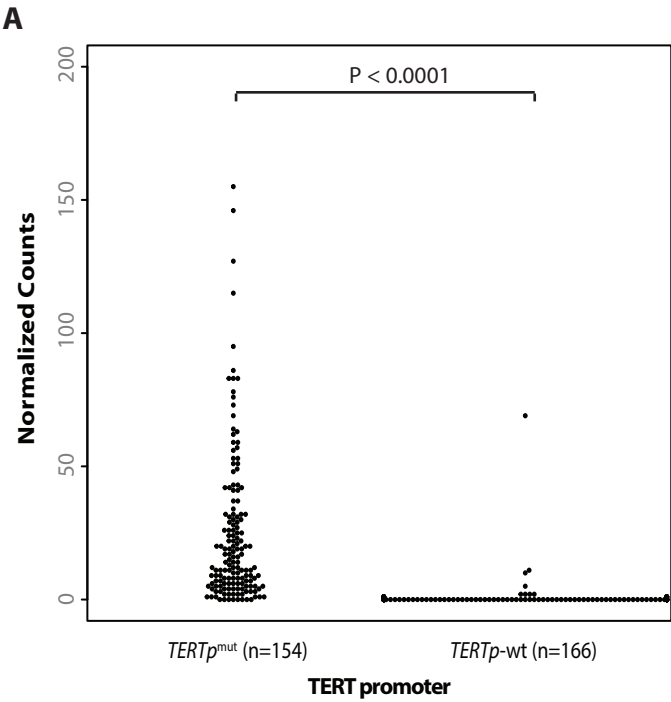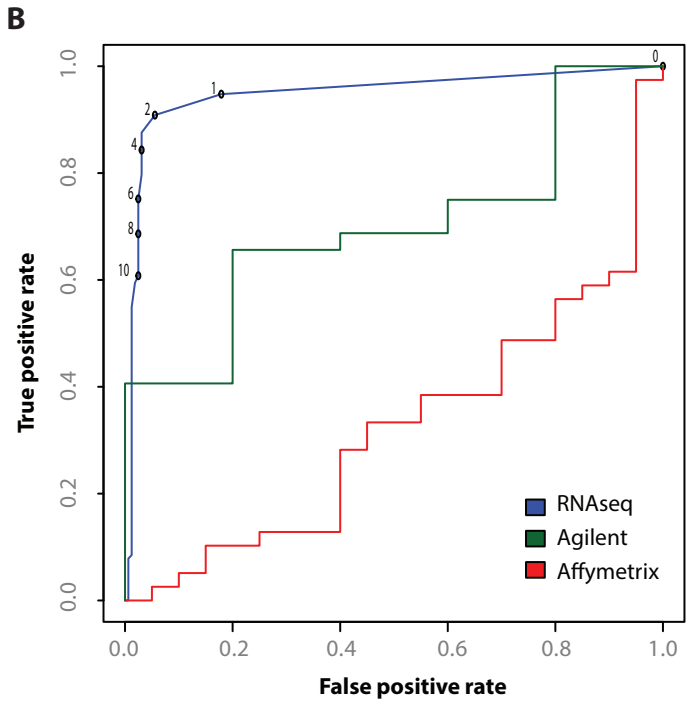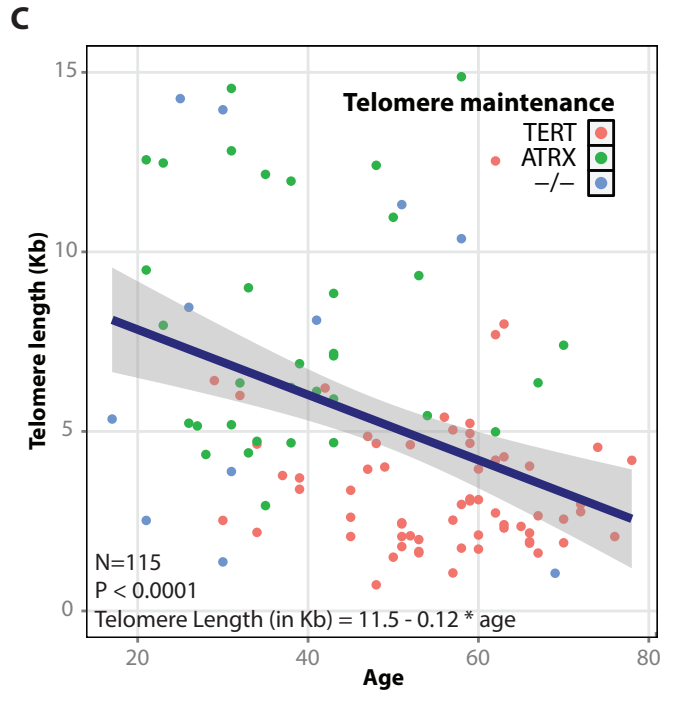

Supplement: NIHMS746836-supplement-1.pdf [file NIHMS746836-supplement-1.pdf]

**A**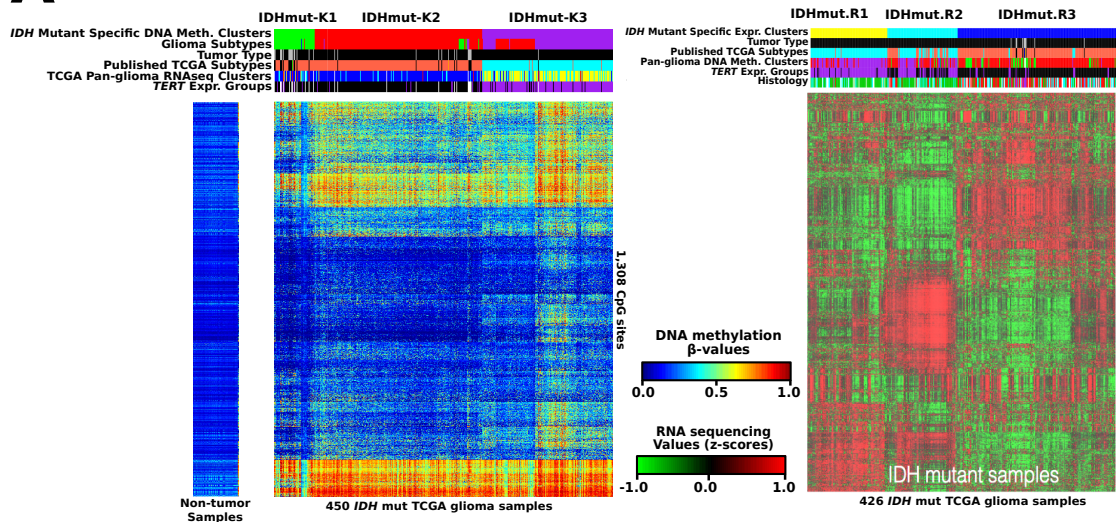**B**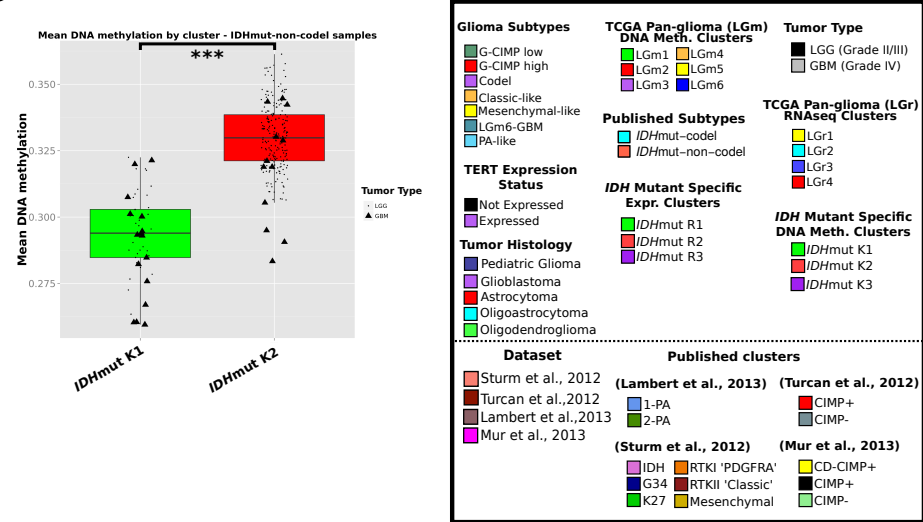**C**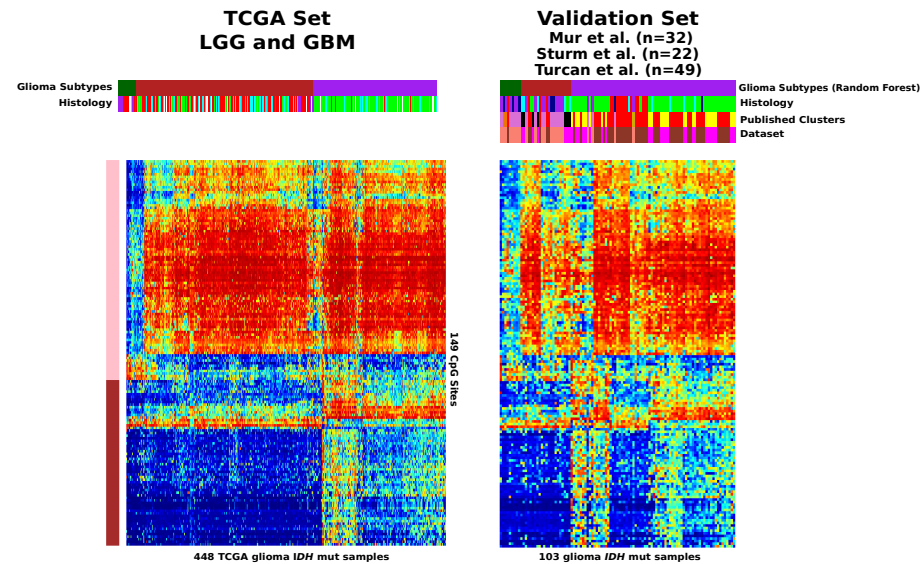**D**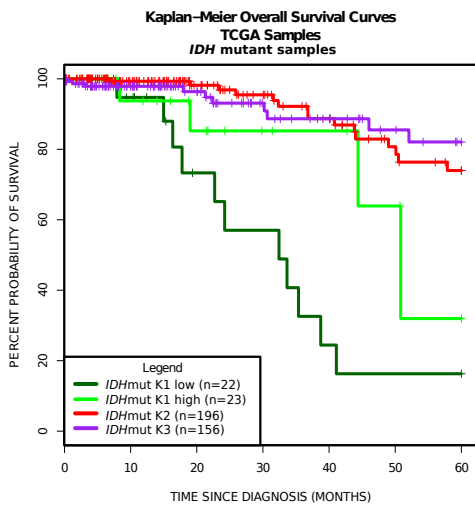**E**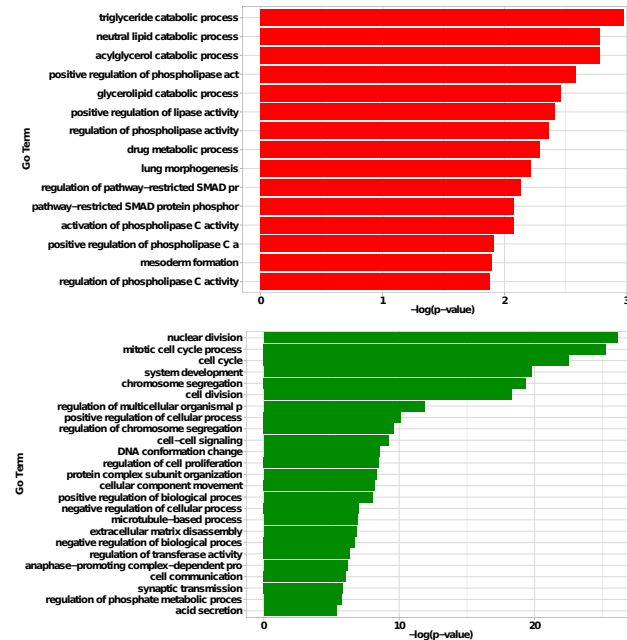

Supplement: NIHMS746836-supplement-4.pdf [file NIHMS746836-supplement-4.pdf]
